# Supplementary material for: The Effects of Temperature and Pressure on Protein-Ligand Binding in the Presence of Mars-Relevant Salts
Source: MDPI journal article supplement (doi:10.3390/biology10070687), 2021-07-20
Supplement: s1 [file s1]

## Supplementary Materials

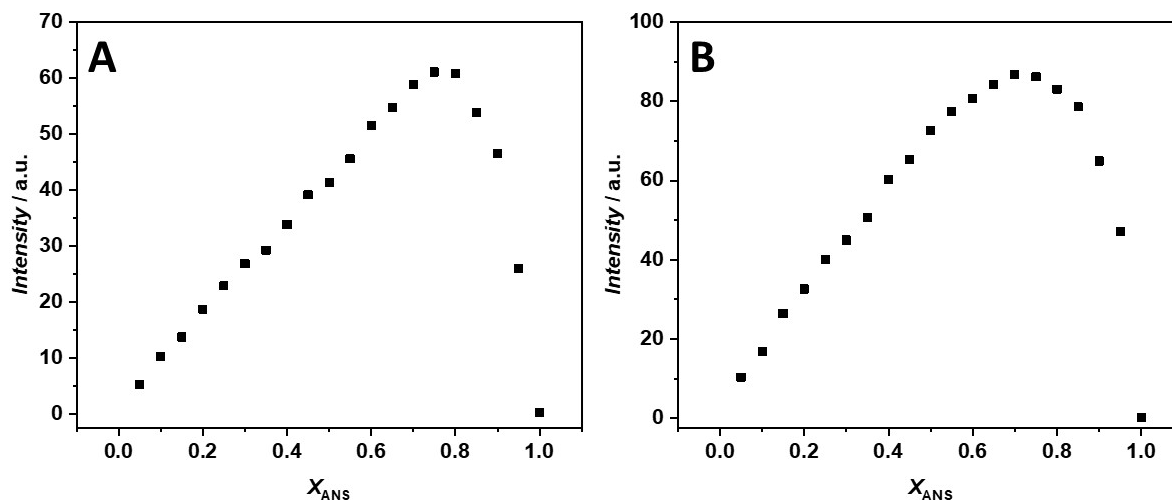

**Figure S1.** Job's plot for ANS:BSA complex formation obtained in the presence of 250 mM  $MgCl_2$  at the temperature of (A) 5 °C and (B) 15 °C and at the pressure of 1 bar. The total concentration ((ANS) + (BSA)) was 35  $\mu M$ .

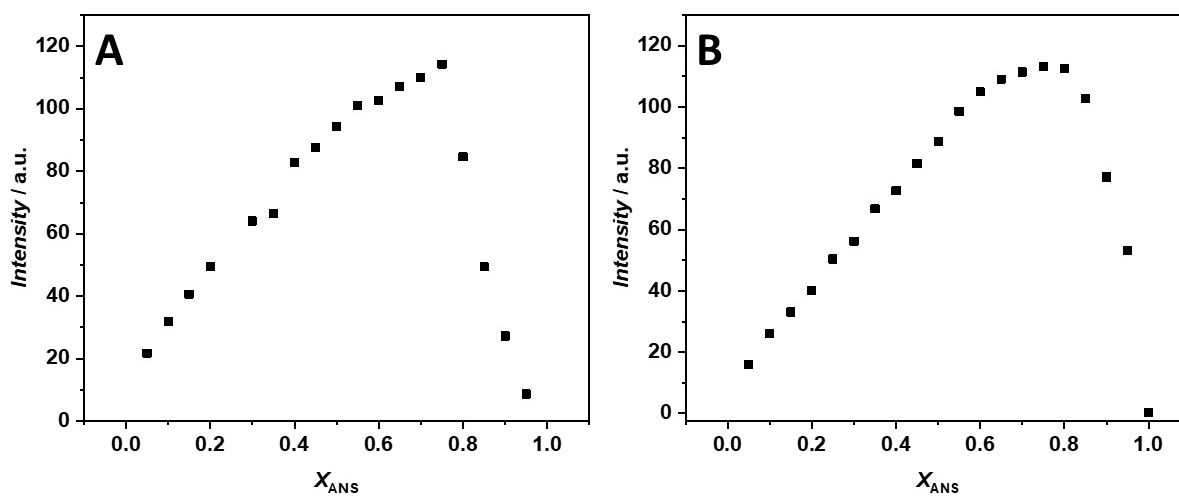

**Figure S2.** Job's plot for ANS:BSA complex formation obtained in the presence of 250 mM  $MgSO_4$  at the temperature of (A) 5 °C and (B) 15 °C and at the pressure of 1 bar. The total concentration ((ANS) + (BSA)) was 35  $\mu M$ .

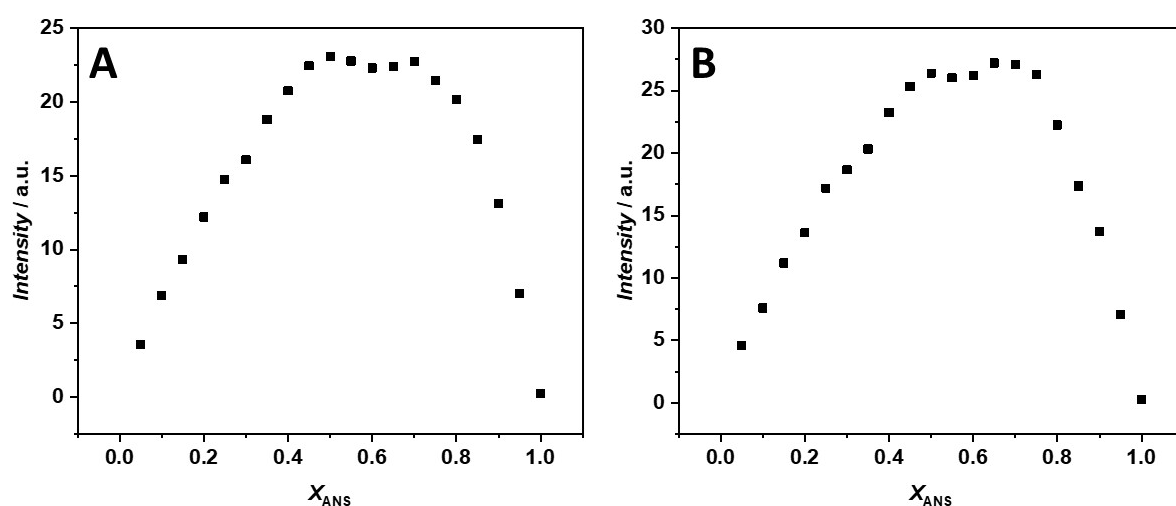

**Figure S3.** Job's plot for ANS:BSA complex formation obtained in the presence of 250 mM  $Mg(ClO_4)_2$  at (A) 5 °C and (B) 15 °C and at the pressure of 1 bar. The total concentration ((ANS) + (BSA)) was 35  $\mu$ M.

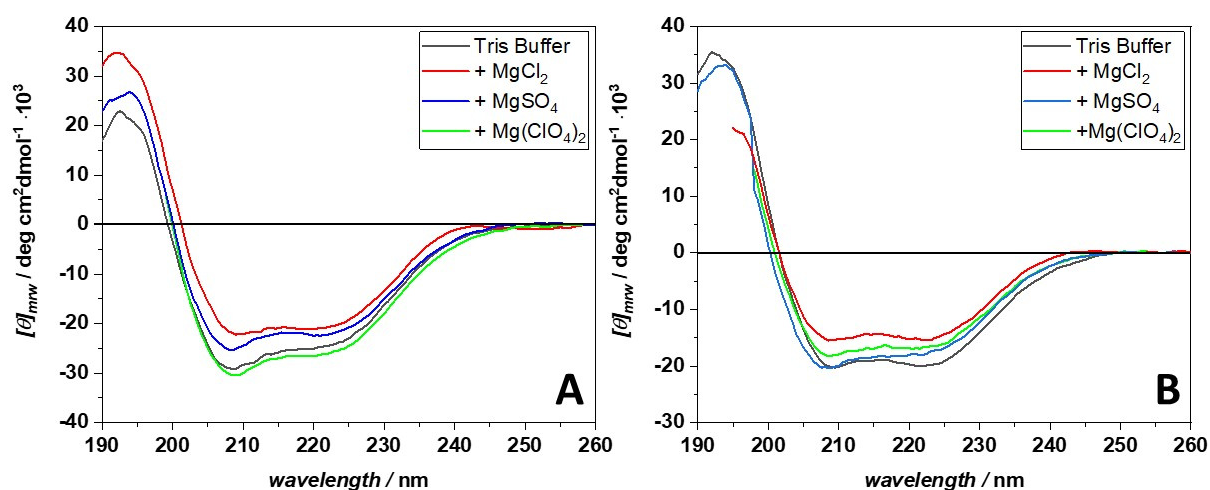

**Figure S4.** Far-UV CD spectra of BSA at the temperature of (A) 5 °C and (B) 15 °C, in the presence of 250 mM  $MgCl_2$  (red spectrum),  $MgSO_4$  (blue spectrum), and  $Mg(ClO_4)_2$  (green spectrum). For reference, the CD spectrum of BSA in neat buffer condition (black spectrum) is also reported. All the spectra were acquired in 10 mM Tris-HCl buffer, pH 7.4, using a 0.01 cm path-length quartz cuvette.
